# Supplementary material for: Prior Placement of Male Urethral Slings Can Increase the Need for Revision of Artificial Urinary Sphincters
Source: MDPI journal article supplement (doi:10.3390/jcm10245842), 2021-12-13
Supplement: s1 [file s1]

Supplementary Table S1

Supplemental Table: Multivariable Models

| <b>Erosion/Infection</b> | Standardized Coefficients | OR     | Sig.  | 95.0% CI |       |
|--------------------------|---------------------------|--------|-------|----------|-------|
|                          | Beta                      |        |       | Lower    | Upper |
| (Constant)               |                           | 1.332  | 0.185 | −0.04    | 0.206 |
| Age >65 years            | 0.016                     | 0.176  | 0.861 | −0.12    | 0.143 |
| Diabetes                 | 0.038                     | 0.429  | 0.669 | −0.133   | 0.206 |
| PVD                      | 0.048                     | 0.542  | 0.589 | −0.257   | 0.451 |
| Radiation                | 0.114                     | 1.239  | 0.218 | −0.05    | 0.217 |
| Urethroplasty            | −0.028                    | −0.314 | 0.754 | −0.212   | 0.154 |
| Prior Sling              | 0.04                      | 0.445  | 0.657 | −0.134   | 0.212 |
| 3.5 cm cuff              | 0.035                     | 0.398  | 0.691 | −0.121   | 0.183 |
| <b>Revision</b>          | Standardized Coefficients | OR     | Sig.  | 95.0% CI |       |
|                          | Beta                      |        |       | Lower    | Upper |
| (Constant)               |                           | 1.054  | 0.294 | −0.059   | 0.193 |
| Age >65 years            | 0.045                     | 0.51   | 0.611 | −0.1     | 0.169 |
| Diabetes                 | 0.112                     | 1.309  | 0.193 | −0.059   | 0.288 |
| PVD                      | −0.069                    | −0.807 | 0.421 | −0.51    | 0.215 |
| Radiation                | −0.037                    | −0.414 | 0.679 | −0.165   | 0.108 |
| Urethroplasty            | 0.028                     | 0.326  | 0.745 | −0.157   | 0.219 |
| Prior Sling              | 0.226                     | 2.628  | 0.01  | 0.058    | 0.414 |
| 3.5 cm cuff              | 0.138                     | 1.614  | 0.109 | −0.029   | 0.283 |
| <b>Any Reoperation</b>   | Standardized Coefficients | OR     | Sig.  | 95.0% CI |       |
|                          | Beta                      |        |       | Lower    | Upper |
| (Constant)               |                           | 1.867  | 0.064 | −0.009   | 0.309 |
| Age >65 years            | 0.048                     | 0.54   | 0.59  | −0.123   | 0.216 |
| Diabetes                 | 0.119                     | 1.369  | 0.173 | −0.067   | 0.37  |
| PVD                      | −0.019                    | −0.22  | 0.826 | −0.508   | 0.406 |
| Radiation                | 0.056                     | 0.631  | 0.529 | −0.117   | 0.227 |
| Urethroplasty            | 0.001                     | 0.015  | 0.988 | −0.235   | 0.239 |
| Prior Sling              | 0.211                     | 2.428  | 0.017 | 0.051    | 0.499 |

|             |       |       |       |        |       |
|-------------|-------|-------|-------|--------|-------|
| 3.5 cm cuff | 0.137 | 1.587 | 0.115 | -0.039 | 0.354 |
|-------------|-------|-------|-------|--------|-------|
